# Supplementary material
Source: Springer Nature journal article supplement (https://www.springermedizin.de/resource/supplementary/13033_2008_24_MOESM2_ESM.pdf/9651680)

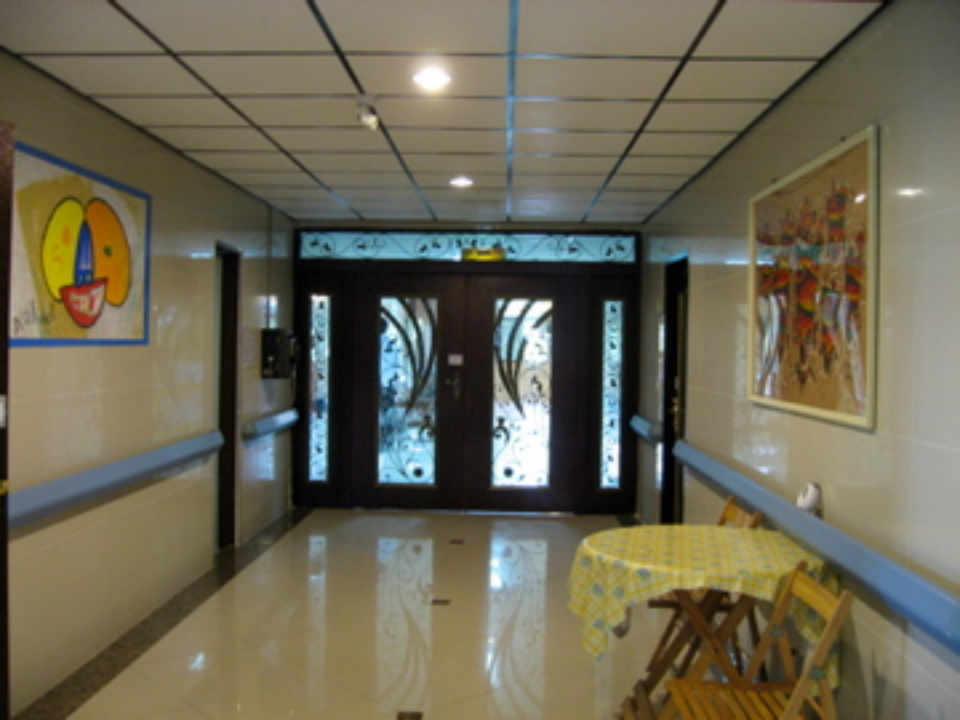

Supplement: MOESM2 [file 9651680]
